# Supplementary material for: The Putative Mevalonate Diphosphate Decarboxylase from Picrophilus torridus Is in Reality a Mevalonate-3-Kinase with High Potential for Bioproduction of Isobutene
Source: PubMed Central journal article supplement (PMC4357925; doi:10.1128/aem.04033-14), 2015-03-12
Supplement: AEM.04033-14_zam999116164so1.pdf [file AEM.04033-14_zam999116164so1.pdf]

## Supplementary Information

**Table S1: search for homologues of <sup>put</sup>PtMVD.** Sequences were searched with BLASTp (1) using the <sup>put</sup>PtMVD amino acid sequence (GenBank (2) entry AAT43941) within nonredundant sequences database (July 2014). The E value cut off was 0.1 and among several resulting hits, the 47 most significant were aligned with MUSCLE (3). *Thermoplasmatales* proteins are in bold

|    | Organism                                          | NCBI Reference | Identity (%) | Similarity (%) | E value   |
|----|---------------------------------------------------|----------------|--------------|----------------|-----------|
| 1  | <b><i>Picrophilus torridus</i></b>                | YP_024134      | 100          | 100            | -         |
| 2  | <b><i>Ferroplasma acidarmanus</i></b>             | YP_008142696   | 58.02        | 76.23          | 2.00E-131 |
| 3  | <b><i>Thermoplasma volcanium</i></b>              | NP_110839      | 42.86        | 66.46          | 1.00E-83  |
| 4  | <b><i>Thermoplasma acidophilum</i></b>            | NP_394760      | 38.73        | 63.81          | 8.00E-70  |
| 5  | <b><i>Thermoplasmatales archaeon A-plasma</i></b> | WP_021795407   | 53.7         | 75.93          | 3.00E-11  |
| 6  | <i>Lactobacillus versmoldensis</i>                | WP_010623536   | 22.47        | 43.99          | 8.00E-06  |
| 7  | <i>Lactobacillus iners</i>                        | WP_006736906   | 22.29        | 42.52          | 3.00E-05  |
| 8  | <i>Streptococcus entericus</i>                    | WP_018367392   | 22.92        | 40.86          | 4.00E-04  |
| 9  | <i>Encephalitozoon intestinalis</i>               | XP_003073009   | 24.76        | 40.84          | 5.00E-04  |
| 10 | <i>Candidatus Micrarchaeum acidiphilum</i>        | EET89942       | 23.2         | 43.89          | 9.00E-04  |
| 11 | <i>Halonotius sp.</i>                             | WP_021040093   | 23.24        | 41.9           | 0.001     |
| 12 | <i>Salinarchaeum sp.</i>                          | YP_008055205   | 19.57        | 43.48          | 0.002     |
| 13 | <i>Enterococcus faecium</i>                       | WP_002351456   | 19.03        | 41.69          | 0.002     |
| 14 | <i>Streptococcus parauberis</i>                   | WP_003104536   | 25.08        | 42.67          | 0.002     |
| 15 | <i>Marinilabilia salmonicolor</i>                 | WP_010661914   | 24.63        | 44.83          | 0.002     |
| 16 | <i>Borrelia afzelii</i>                           | YP_006931874   | 23.55        | 43.43          | 0.002     |

|    |                                          |              |       |       |       |
|----|------------------------------------------|--------------|-------|-------|-------|
| 17 | <i>Halococcus kunzii</i>                 | WP_005398566 | 22.57 | 45.14 | 0.002 |
| 18 | <i>Borrelia garinii</i>                  | YP_073129    | 25    | 45.67 | 0.003 |
| 19 | <i>Waddlia chondrophila</i>              | YP_003709481 | 25.47 | 47.2  | 0.003 |
| 20 | <i>Haloferax elongans</i>                | WP_008324111 | 22.26 | 40.85 | 0.003 |
| 21 | <i>Natronomonas moolapensis</i>          | YP_007486922 | 21.54 | 40    | 0.004 |
| 22 | <i>Haloferax gibbonsii</i>               | WP_004977100 | 21.54 | 41.85 | 0.006 |
| 23 | <i>Gardnerella vaginalis</i>             | YP_003373567 | 24.86 | 46.49 | 0.006 |
| 24 | <i>Lactobacillus plantarum</i>           | YP_007986982 | 20.8  | 40.67 | 0.008 |
| 25 | <i>Halorubrum lipolyticum</i>            | WP_008006049 | 24.38 | 39.67 | 0.009 |
| 26 | <i>Halorhabdus utahensi</i>              | YP_003129610 | 21.88 | 39.38 | 0.01  |
| 27 | <i>Borrelia bissettii</i>                | YP_004777918 | 30.19 | 47.17 | 0.012 |
| 28 | <i>Methanomassiliicoccus luminyensis</i> | WP_019177897 | 21.89 | 42.42 | 0.016 |
| 29 | <i>Halococcus thailandensis</i>          | WP_007742266 | 22.39 | 40.8  | 0.016 |
| 30 | <i>Pneumocystis jirovecii</i>            | CCJ31570     | 22.71 | 43    | 0.017 |
| 31 | <i>Haloferax prahovense</i>              | WP_008093241 | 21.81 | 41.43 | 0.018 |
| 32 | <i>Halogramum salarium</i>               | WP_009374450 | 22.56 | 40.85 | 0.021 |
| 33 | <i>Acholeplasma palmae</i>               | CCV64523     | 21.45 | 44.16 | 0.022 |
| 34 | <i>Guillardia theta</i>                  | XP_005819249 | 21.9  | 39.54 | 0.023 |
| 35 | <i>Halococcus morrhuae</i>               | WP_004055468 | 21.98 | 41.49 | 0.024 |
| 36 | <i>Haloferax larsenii</i>                | WP_007540006 | 21.6  | 41.05 | 0.028 |
| 37 | <i>Borrelia burgdorferi</i>              | YP_005806868 | 26.15 | 47.25 | 0.031 |
| 38 | <i>Halococcus hamelinensis</i>           | WP_007692401 | 21.47 | 40.49 | 0.032 |
| 39 | <i>Haloarcula vallismortis</i>           | WP_004518165 | 22.26 | 40.24 | 0.035 |
| 40 | <i>Haloferax volcanii</i>                | YP_003535463 | 21.28 | 41.03 | 0.035 |
| 41 | <i>Lactobacillus ruminis</i>             | YP_004832120 | 22.9  | 44.84 | 0.036 |

|    |                                |              |       |       |       |
|----|--------------------------------|--------------|-------|-------|-------|
| 42 | <i>Lactobacillus vaginalis</i> | WP_003716957 | 25.41 | 42.7  | 0.05  |
| 43 | <i>Streptococcus macacae</i>   | WP_003081606 | 22.04 | 41.45 | 0.055 |
| 44 | <i>Kazachstania africana</i>   | XP_003956599 | 23.45 | 42.41 | 0.059 |
| 45 | <i>Pneumocystis murina</i>     | EMR10307     | 21.81 | 42.68 | 0.072 |
| 46 | <i>Haloferax sulfurifontis</i> | WP_007273787 | 21.54 | 41.85 | 0.086 |
| 47 | <i>Halobacterium salinarum</i> | YP_001688719 | 21.9  | 39.68 | 0.098 |

**Figure S2: gene sequence encoding <sup>put</sup>PtMVD.** The gene sequence used was an optimized version for expression in *Escherichia coli*, already demonstrated to give higher expression yields (4).

```
1   ATGGAGAACTATAATGTAA AACCCGTGCATTCCGACCA TTGGTATTATTCTGCTGGGT GGCATTAGCGACAAAAAAA
81  CCGTATTCCGCTGCATACCA CCGCAGGTATTGCATATACC GGCATCAATAACGATGTGTA CACCGAAACCAAAGTATG
161 TGAGCAAAGACGAAAAATGC TATATCGATGGCAAAGAAAT CGATCTGAATAGCGATCGTA GCCCGAGCAAAGTGATCGAT
241 AAATTCAAACATGAAATCCT GATGCGTGTGAATCTGGATG ATGAAAACAACCTGAGCATT GATAGCCGCAATTTAACAT
321 TCTGAGCGGTAGCAGCGATA GCGGTGCAGCAGCACTGGGT GAATGCATTGAAAGCATCTT CGAGTACAACATCAACATCT
401 TCACCTTTGAAAATGATCTG CAGCGTATTAGCGAAAGCGT TGGTCGTAGCCTGTATGGTG GTCTGACCGTTAATTATGCA
481 AATGGTCGTGAAAGCCTGAC CGAACCGCTGCTGGAACCGG AAGCATTTAACAACTTTACC ATCATCGGTGCCCATTTTAA
561 CATTGATCGCAAACCGAGCA ACGAAATCCACGAAAACATC ATCAAACATGAGAACTATCG CGAACGTATTAAGCGCAG
641 AGCGCAAAGCAAAAAACTG GAAGAACTGAGCCGTAATGC CAACATTAAGGCATTTTGG AACTGGCAGAAAGCGATACC
721 GTGGAATATCATAAAATGCT GCATGATGTGGGCGTTGATA TTATCAATGACCGCATGGAA AATCTGATTGAACGCGTGAA
801 AGAGATGAAAAACAATTCTT GGAACAGCTATATTGTTACC GGTGGTCCGAATGTTTTTGT GATCACCGAGAAAAAAGATG
881 TGGATAAAGCCATGGAAGGT CTGAATGATCTGTGTGATGA TATTCGTCTGCTGAAAGTTG CAGGTAAACCGCAGGTTATC
961 AGCAAAAACCTTCTAATGA
```

**Figure S3: gene sequence encoding ScMVD.** The gene sequence used was optimized for expression in *E. coli* by the synthesizing company, Biomatik.

```
1   ATGACCGTTTACACCGCGTC TGTGACTGCTCCGGTGAACA TCGCAACTCTGAAATACTGG GGTAAGCGTGATACTAACT
81  GAACCTGCCGACCAACAGCT CTATCAGCGTTACTCTGAGC CAGGACGATCTGCGTACCCT GACCTCTGCAGCTACTGCGC
161 CGGAATTCGAGCGTGACACC CTGTGGCTGAACGGTGAGCC GCACTCTATCGACAACGAAC GTACCCAGAAGTGCCTGCGT
241 GACCTGCGCCAGCTGCGTAA AGAGATGGAATCCAAGGATG CGAGCCTGCCGACTCTGTCT CAGTGGAAACTGCACATCGT
321 TTCTGAGAACAACCTCCCGA CCGCAGCGGGCCTGGCGTCT TCTGCTGCGGGTTTCGCGGC ACTGGTTAGCGCGATTGCGA
401 AACTGTACCAGCTGCCGAG TCTACCTCTGAGATTTCTCG TATCGCGCGCAAGGGCTCTG GCTCTGCGTGCCGTTCTCTG
481 TTTGGTGGCTATGTTGCGTG GGAGATGGGCAAAGCTGAGG ACGGTCACGACTCTATGGCG GTTCAGATCGCGGACTCTTC
561 TGACTGGCCGAGATGAAAG CGTGTGTTCTGGTTGTGAGC GACATCAAGAAGGACGTTTC TTCTACCCAGGGTATGCAGC
641 TGACCGTGGCGACCAGCGAA CTGTTTAAGGAGCGTATCGA ACACGTTGTTCCGAAGCGTT TTGAGGTTATGCGTAAGGCT
721 ATTGTTGAAAAGACTTCGC AACCTTCGCTAAAGAAACCA TGATGGACTCCAACCTCCTTT CACGCGACCTGCCTGGATTC
801 TTTCCCGCCGATTTTCTACA TGAACGACACCTCTAAACGT ATCATTTCCTGGTGCCACAC CATCAACCAGTTCTATGGTG
881 AACTATCGTTGCGTACACC TTCGACGCGGGTCCGAACGC TGTCTGTACTACCTGGCGG AAAACGAATCTAAGCTGTTT
961 GCATTCATTACAACTGTT CGGTTCTGTTCCGGGCTGGG ACAAAAAGTTCACCACTGAA CAGCTGGAGCGGTTTAACCA
1041 CCAGTTTGAGTCTTCTAACT TCACCGCGCGTGAGCTGGAC CTGGAAGTGCAGAAAGACGT TGCGCGTGTATCCTGACCC
1121 AGGTTGGTTCTGGCCCGCAG GAAACCAACGAGTCCCTGAT CGATGCGAAAACCGGTCTGC CGAAGGAATAA
```

**Figure S4: Full  $^{13}\text{C}$  NMR spectrum of (*R*)-mevalonate.** Six single peaks corresponding to the six carbons of (*R*)-mevalonate are shown. Spectra were acquired on a 500 MHz Bruker AV(III)500 spectrometer equipped with a cryoprobe. Data were processed and analysed using ACD/NMR Processor version 12.01

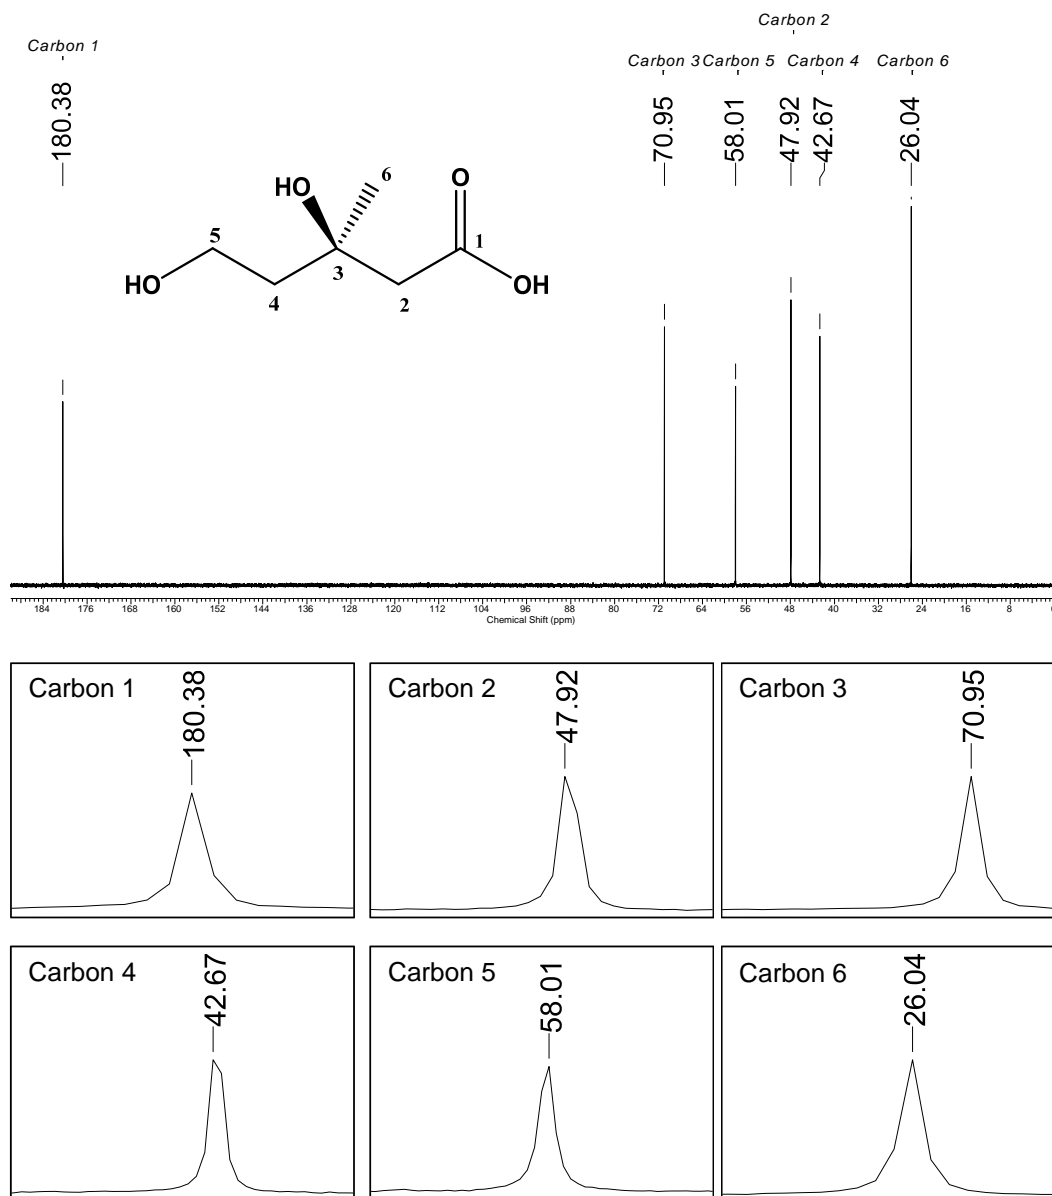

**Figure S5: Full  $^{13}\text{C}$  NMR spectrum of (*R,S*)-mevalonate-5-phosphate.** Doublet peaks are observed corresponding to carbons 4 and 5 of (*R,S*)-mevalonate-5-phosphate. Spectra were acquired on a 500 MHz Bruker AV(III)500 spectrometer equipped with a cryoprobe. Data were processed and analysed using ACD/NMR Processor version 12.01

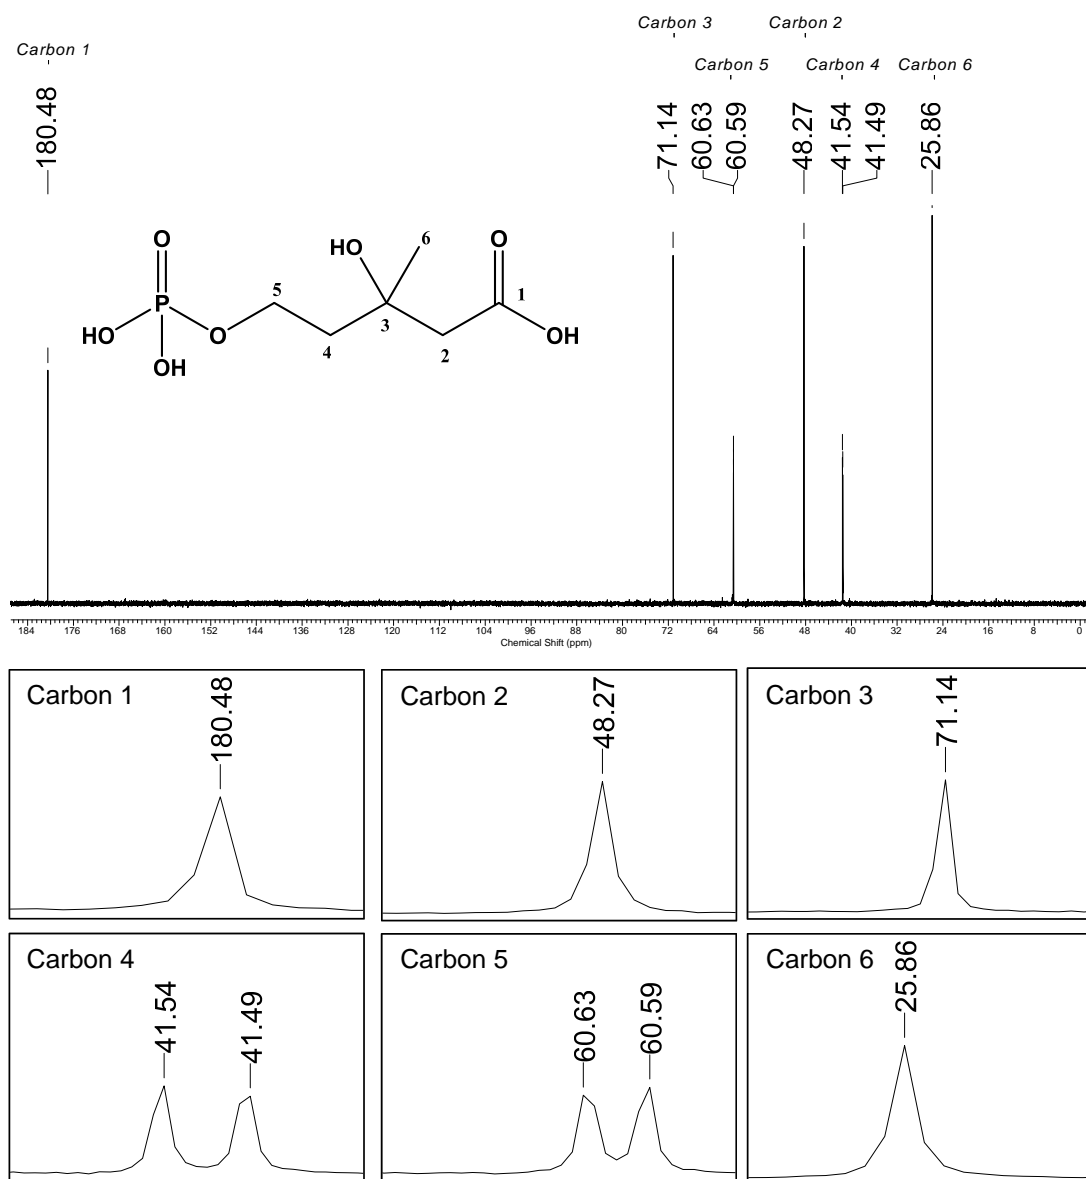

**Figure S6: Full  $^{13}\text{C}$  NMR spectrum of test reaction containing (*R*)-mevalonate and  $^{13}\text{C}$ -*Pt*MVD (*Pt*M3K).** Doublet peaks are observed corresponding to carbons 2 to 4 and 6. Additional peaks in the spectrum are from unreacted mevalonate, and phosphoenolpyruvate and pyruvate, which are present due to the system to regenerate ATP as previously described (5). Spectra were acquired on a 500 MHz Bruker AV(III)500 spectrometer equipped with a cryoprobe. Data were processed and analysed using ACD/NMR Processor version 12.01

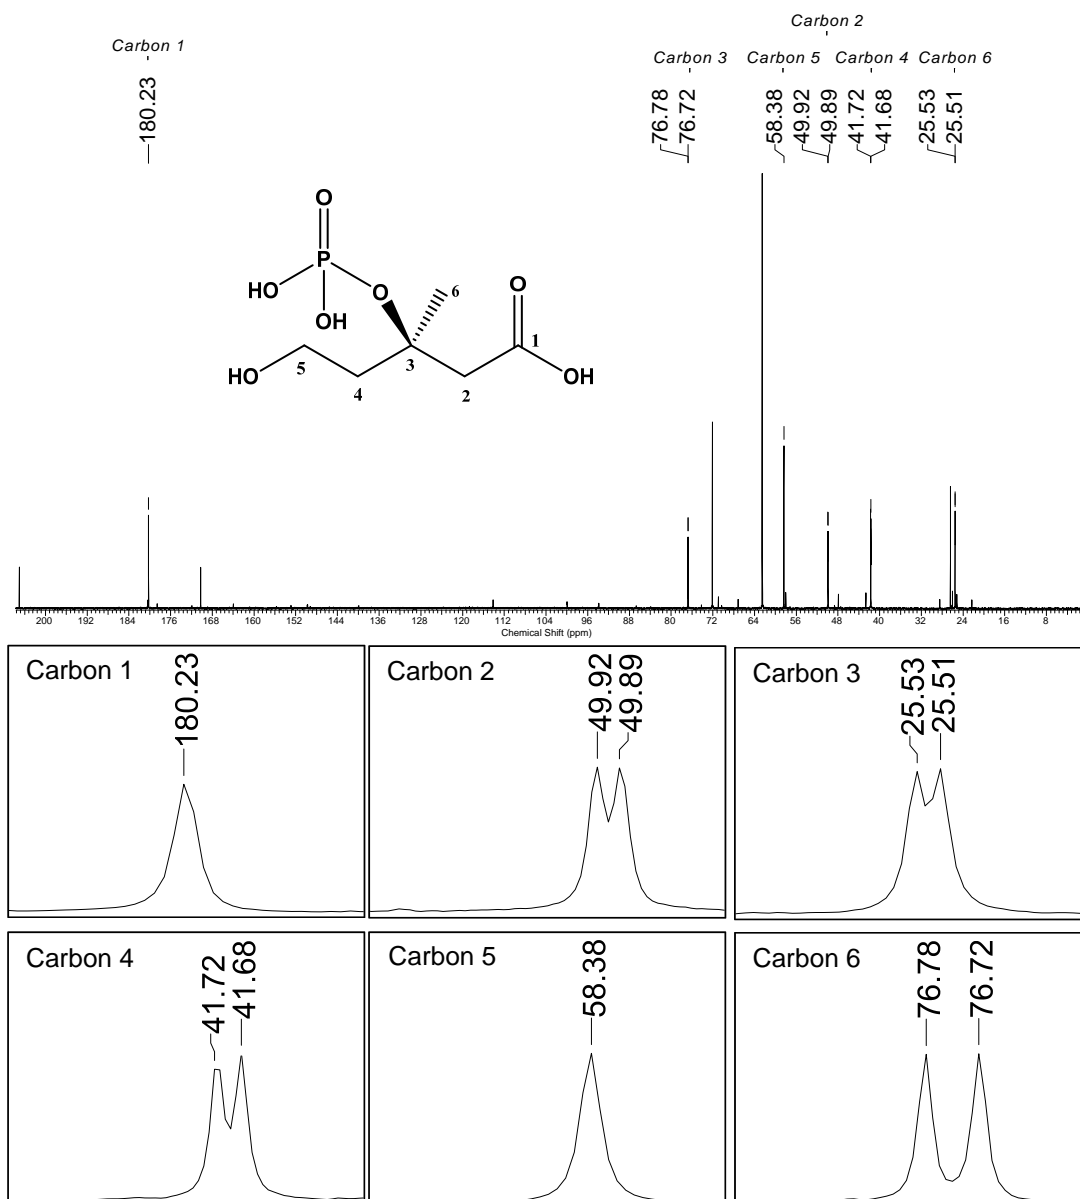



**Table S7: Search for homologues of the newly discovered mevalonate-3-phosphate-5-kinase from *T. acidophilum* (5).**

Sequences were searched with BLASTp (1) using the amino acid sequence of newly discovered *T. acidophilum* Ta0762 (GenBank (2) entry CAC11895) within nonredundant sequences database (July 2014). A 40% identity cut off was set. The *P. torridus* homologue is characterized by a level of identity of 55.5% (in bold).

|   | <b>Organism</b>                            | <b>NCBI Reference</b> | <b>Identity (%)</b> | <b>Similarity (%)</b> | <b>E value</b>  |
|---|--------------------------------------------|-----------------------|---------------------|-----------------------|-----------------|
| 1 | <i>Thermoplasma acidophilum</i>            | WP_010901177          | 100                 | 100                   | -               |
| 2 | <i>Thermoplasma volcanium</i>              | BAB60008              | 54.92               | 74.61                 | 5.00E-72        |
| 3 | <i>Thermoplasmatales archaeon A-plasma</i> | WP_021794774          | 52.88               | 68.06                 | 2.00E-64        |
| 4 | <b><i>Picrophilus torridus</i></b>         | <b>WP_011177280</b>   | <b>55.49</b>        | <b>72.56</b>          | <b>2.00E-56</b> |
| 5 | <i>Ferroplasma sp. Type II</i>             | WP_021787503          | 46.56               | 69.31                 | 4.00E-54        |
| 6 | <i>Thermoplasmatales archaeon E-plasma</i> | WP_021792357          | 45.79               | 66.32                 | 9.00E-53        |
| 7 | <i>Ferroplasma acidarmanus</i>             | WP_009886959          | 45.5                | 68.78                 | 1.00E-51        |

## **References**

1. **Altschul SF, Madden TL, Schaffer AA, Zhang J, Zhang Z, Miller W, Lipman DJ.** 1997. Gapped BLAST and PSI-BLAST: a new generation of protein database search programs. *Nucleic Acids Res.* **25**:3389-3402.
2. **Benson DA, Cavanaugh M, Clark K, Karsch-Mizrachi I, Lipman DJ, Ostell J, Sayers EW.** 2013. GenBank. *Nucleic Acids Res.* **41**:D36-42.
3. **Edgar RC.** 2004. MUSCLE: multiple sequence alignment with high accuracy and high throughput. *Nucleic Acids Res.* **32**:1792-1797.
4. **Marliere P.** January 2010. Production of alkenes by enzymatic decarboxylation of 3-hydroxyalkanoic acids. Patent WO2010001078A2.
5. **Vinokur JM, Korman TP, Cao Z, Bowie JU.** 2014. Evidence of a novel mevalonate pathway in archaea. *Biochemistry* **53**:4161-4168.
